# Supplementary material
Source: PubMed Central journal article supplement (PMC4004682)
Supplement: NIHMS566592-supplement-Supporting_Information.pdf [file NIHMS566592-supplement-Supporting_Information.pdf]

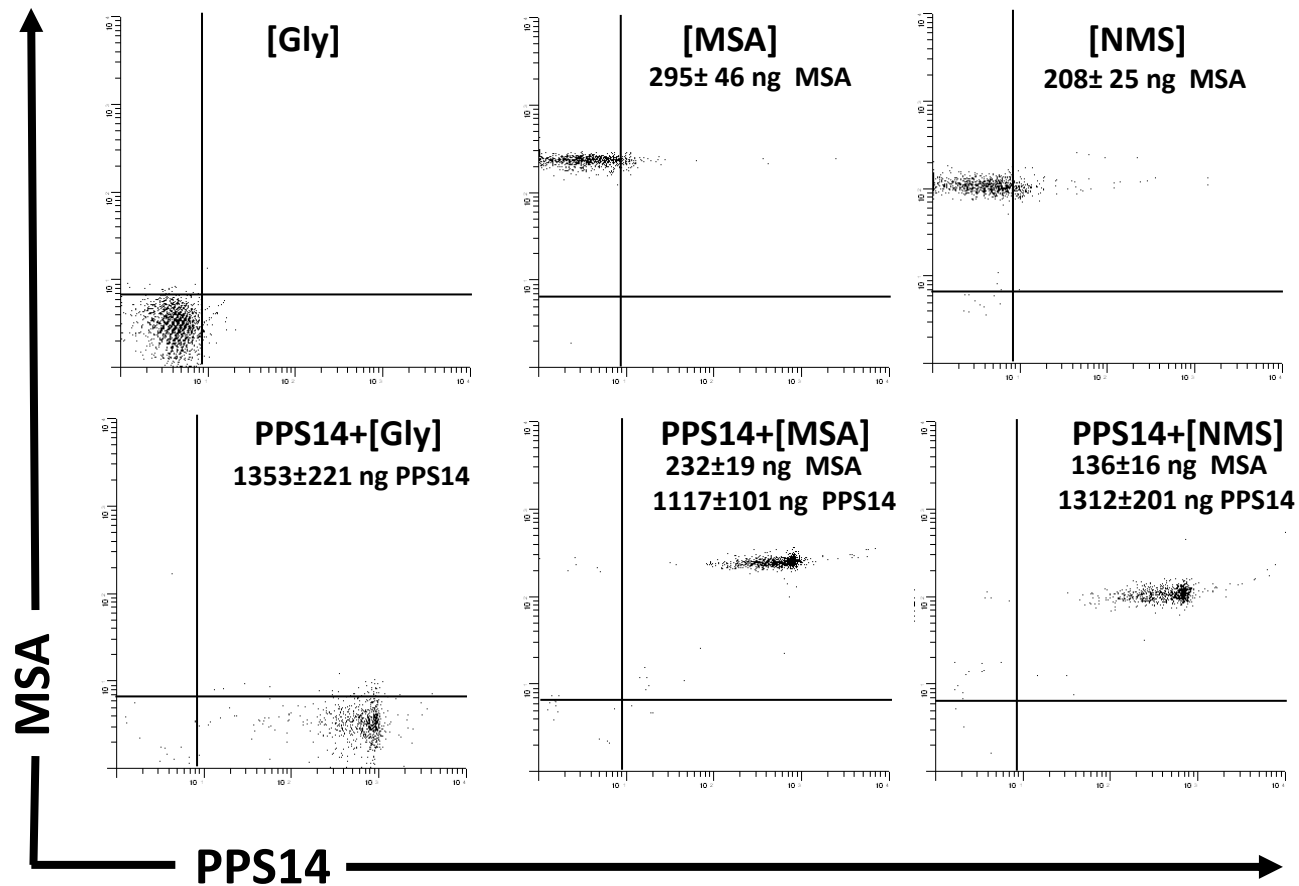

**Supplemental figure 1. Co-attachment of PPS14 and MSA to the surface of latex beads.** Singlet FACS scatter profile of aldehyde-sulfate latex beads, 0.96  $\mu\text{m}$  in diameter, coated with the different antigens and antigen combinations indicated, and stained with unlabeled mouse IgG anti-PPS14 mAb (clone 44.1) and biotinylated goat IgG anti-mouse albumin, followed by incubation with FITC-streptavidin and PE-goat anti-mouse IgG. The MSA, and PPS14 content per  $10^9$  beads, as determined by ELISA, is indicated in each of the representative preparations shown.

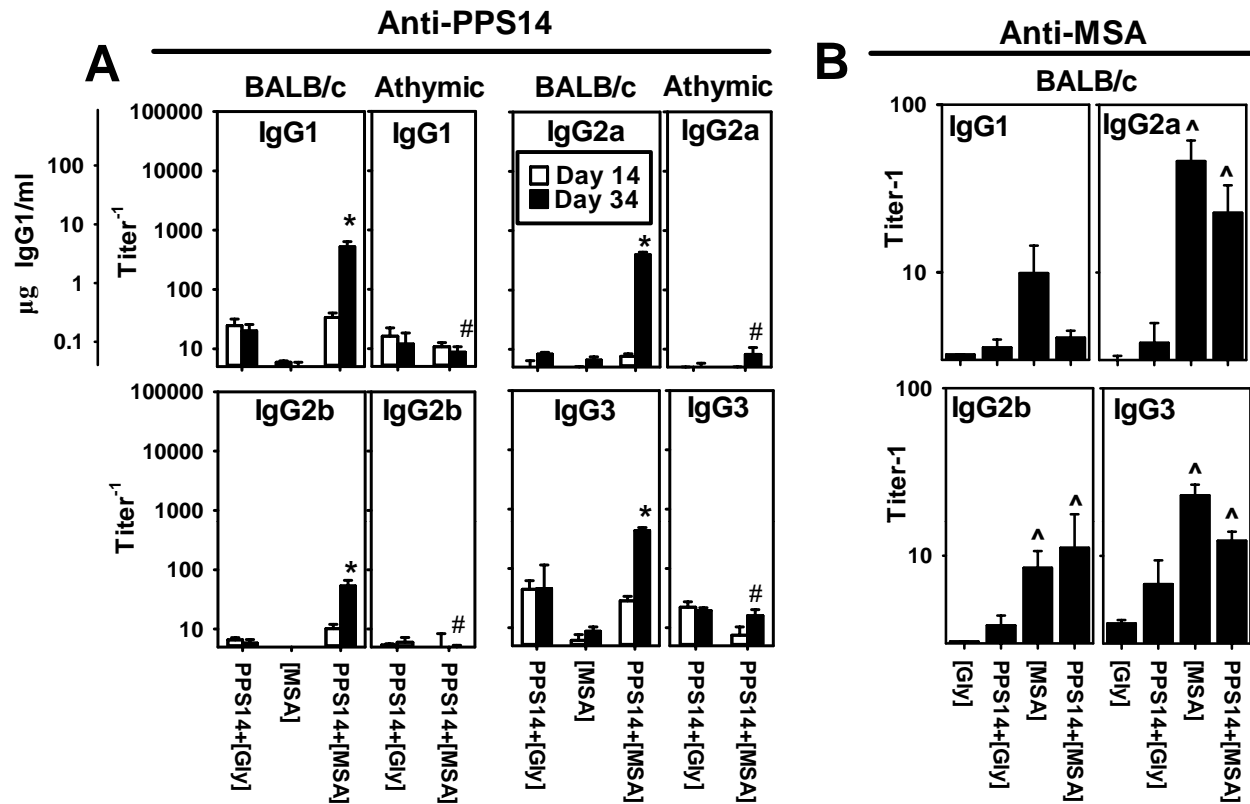

**Supplemental figure 2. PPS14- and MSA-specific IgG isotype responses induced in response to PPS14+[MSA] beads.** (A) Serum PPS14-specific IgG isotype titers and (B) serum MSA-specific IgG isotype titers in BALB/c (BALB/cByJ) and BALB/c athymic nude (CByJ.Cg-Foxn1<sup>nu</sup>/J) mice (n=7), 14 days after a primary immunization (day 14) and 20 days after a secondary immunization (day 34) with  $\approx 2 \times 10^8$  PPS14+[MSA] beads PPS14+[Gly] beads, in alum+CpG-ODN. Responses to beads coated only with MSA ([MSA]) or glycine ([Gly]) were included as controls. For anti-MSA IgG responses only the titers of the secondary response (day 34) are included as anti-MSA IgG responses were undetectable during primary responses. The sera used in the determinations are the same shown in Figure 2. Values are expressed as geometric mean  $\pm$  SEM. For IgG1 determinations a scale in weight units is included as a reference. (A) \*p < 0.05 (titer<sup>-1</sup> in primary relative to secondary response), #p < 0.05 (between the responses elicited in BALB/c versus athymic nude mice for each serum sample and group). (B) ^p < 0.05 (relative to titer<sup>-1</sup> in mice immunized with [Gly]-beads). Student's *t*-test.
